# Supplementary material
Source: Research Square preprint supplement (doi:10.21203/rs.3.rs-8721360/v1)
Supplement: Supplementary file 1 [file 25688600342d86f3a5df9799.docx]

Reactive Oxygen Species -responsive release of tanshinone IIA for polycystic ovary syndrome treatment

Limin Fan1,2, Jiani Xie1, Jianhua Zhou1, Yili Wang1, Yijiao Yang1, Xiaorong Ni1*

1 Department of Gynecology, Shanghai Municipal Hospital of Traditional Chinese Medicine, Shanghai University of Traditional Chinese Medicine, Shanghai 200071, China.

2 School of Medicine, Tongji University, Shanghai 200092, P. R. China.

*Correspondence:

Xiaorong Ni

Department of Gynecology, Shanghai Municipal Hospital of Traditional Chinese Medicine, Shanghai University of Traditional Chinese Medicine, Shanghai 200071, China.

E-mail: szy1120@shutcm.edu.cn


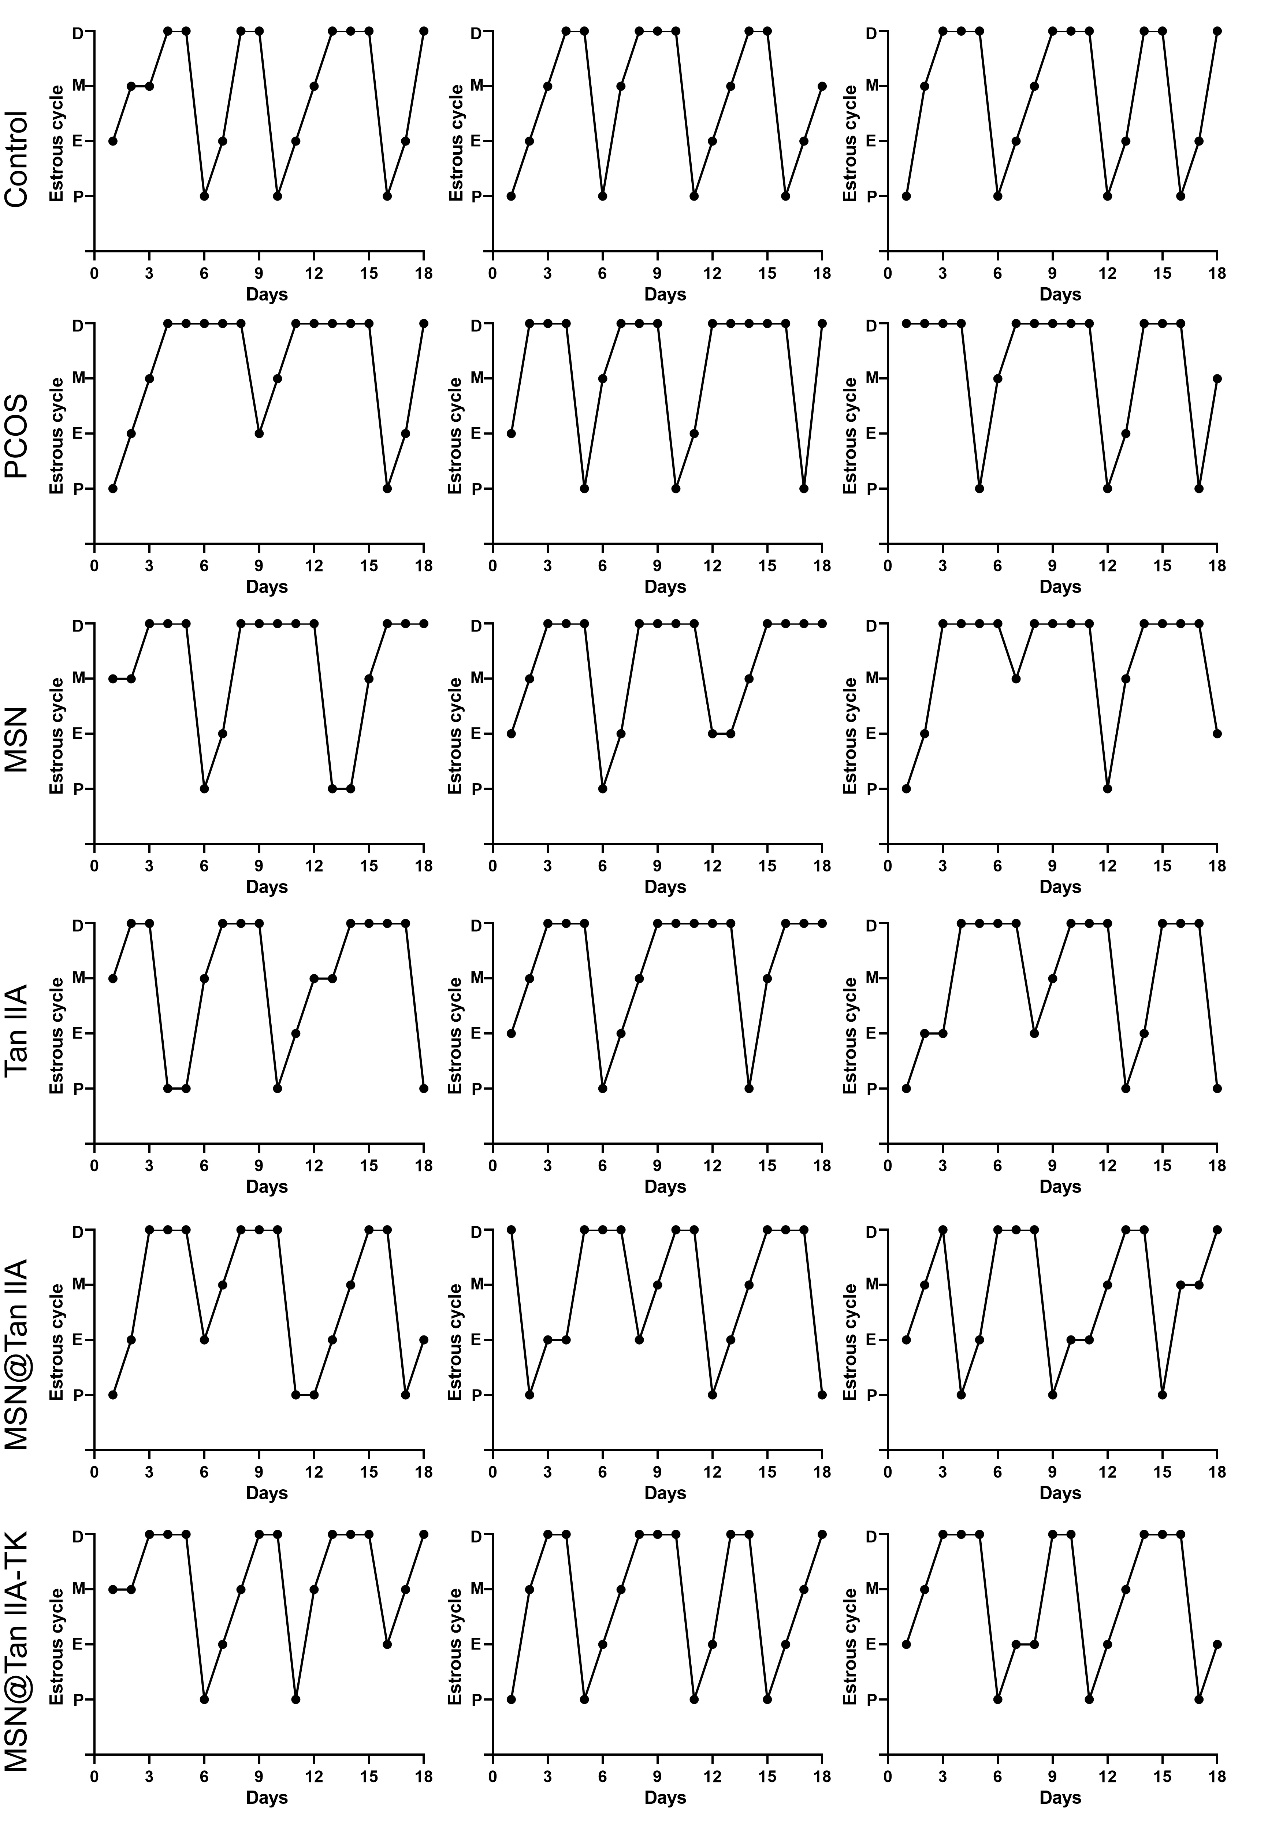


Fig. S1 Assessment of estrous cycles. (A) and (B) Estrus cycle lengths and stages, including proestrus, estrus, metestrus and diestrus were counted.


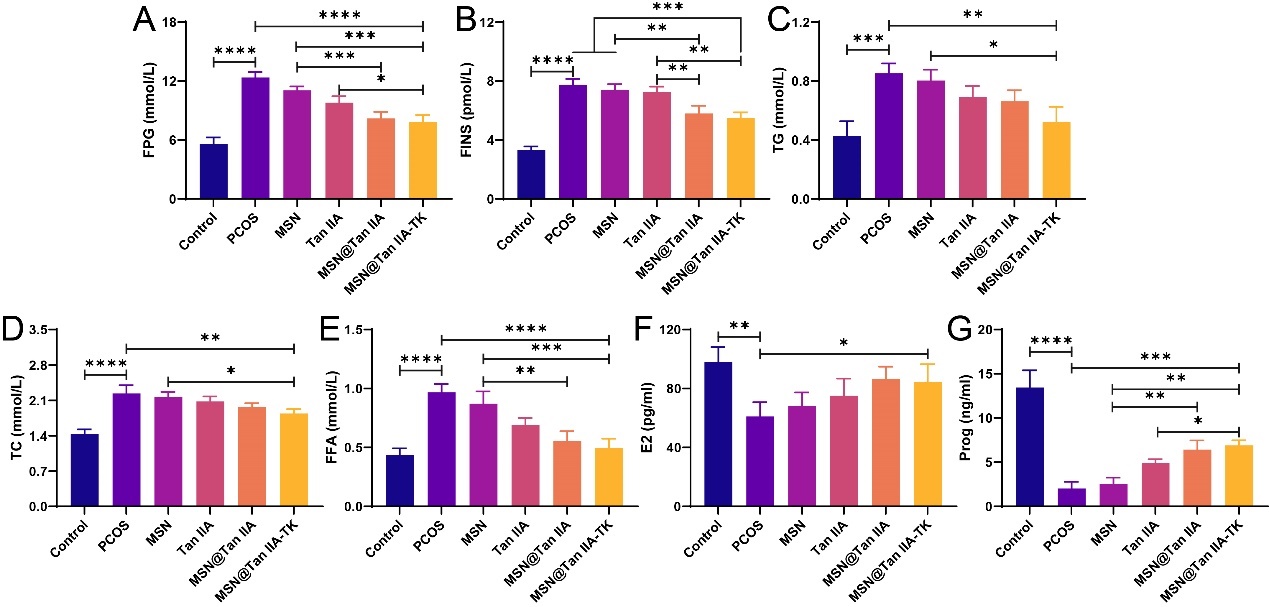


Fig. S2 Detection of (A) FPG, (B) FINS, (C) TG, (D) TC, (E) FFA, (F) E2, and (G) Prog levels in rat blood.


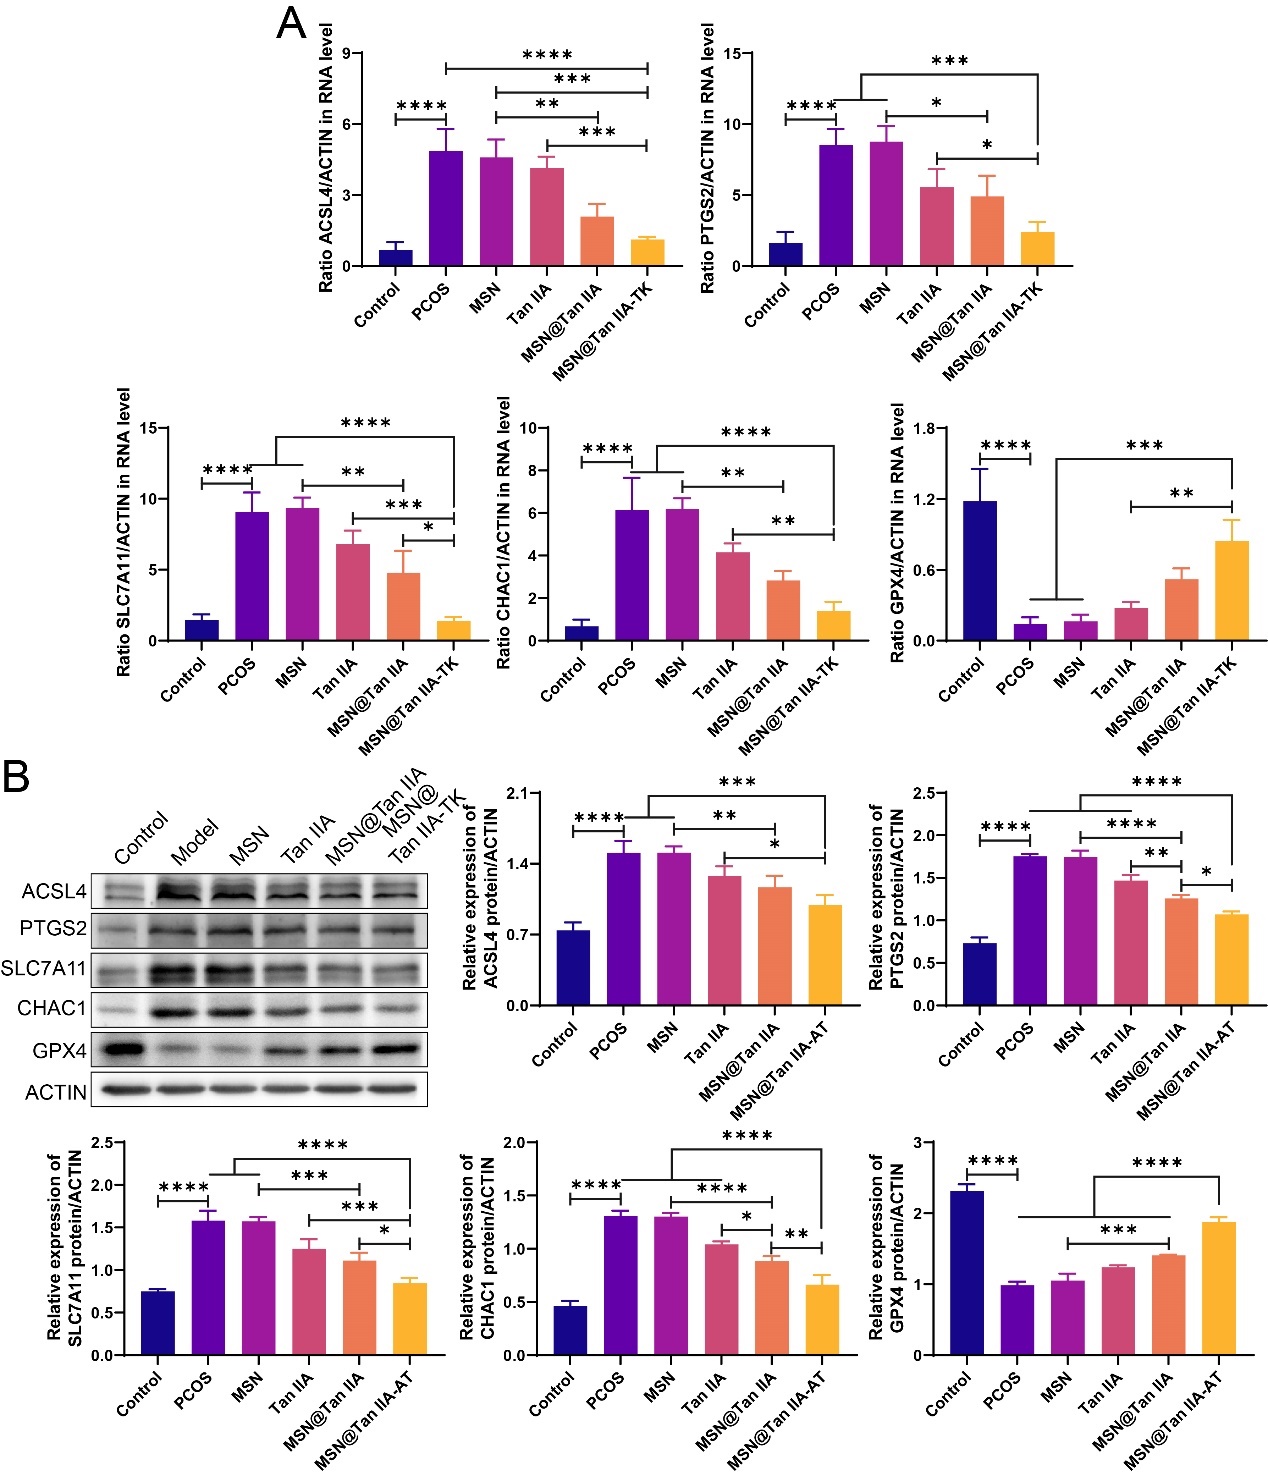


Fig. S3 Detection of ferroptosis markers in rat ovarian tissue. (A) qPCR results of mRNA expression levels of ferroptosis-related genes ACSL4, PTGS2, SLC7A11, CHAC1, and GPX4; (B) Western blot results of protein expression levels of ferroptosis-related genes ACSL4, PTGS2, SLC7A11, CHAC1, and GPX4.


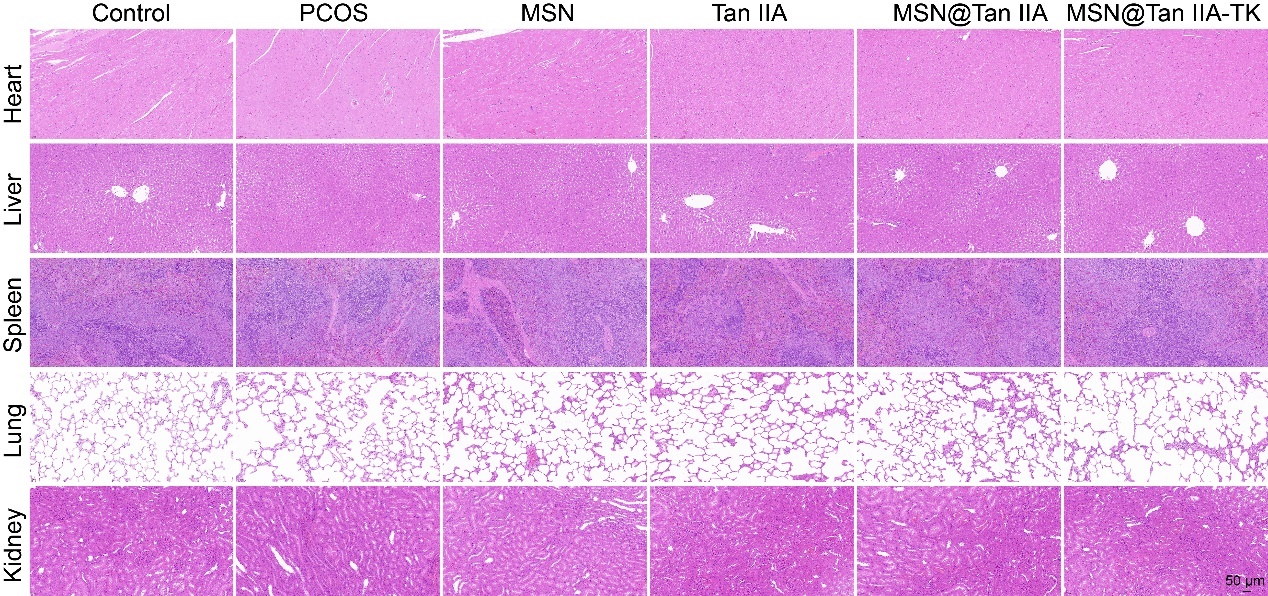


Fig. S4 Representative H&E stained images of major organs (heart, liver, spleen, lung, kidney).
